# Supplementary material
Source: PubMed Central journal article supplement (PMC8316489)
Supplement: NIHMS1674338-supplement-1.pdf [file NIHMS1674338-supplement-1.pdf]

| Clinical sign prompting sepsis work-up            | Frequency cited for all events (n=408)<br>N (%) | Frequency cited for events with HR-SpO <sub>2</sub> data available (n=266)<br>N (%) |
|---------------------------------------------------|-------------------------------------------------|-------------------------------------------------------------------------------------|
| Apnea, bradycardia, or desaturation events        | 193 (47%)                                       | 122 (46%)                                                                           |
| Increased FiO <sub>2</sub> or respiratory support | 149 (37%)                                       | 100 (38%)                                                                           |
| Abnormal CBC value(s)                             | 112 (27%)                                       | 75 (28%)                                                                            |
| Abdominal distension                              | 90 (22%)                                        | 64 (24%)                                                                            |
| Acidosis                                          | 72 (18%)                                        | 48 (18%)                                                                            |
| HeRO score*                                       | 68 (17%)                                        | 62 (23%)                                                                            |
| Abnormal radiographic findings                    | 58 (14%)                                        | 41 (15%)                                                                            |
| C-reactive protein value                          | 51 (13%)                                        | 33 (12%)                                                                            |
| Lethargy                                          | 37 (9%)                                         | 26 (10%)                                                                            |
| Hypotension                                       | 34 (8%)                                         | 20 (8%)                                                                             |
| Urgent intubation                                 | 34 (8%)                                         | 29 (11%)                                                                            |
| Hypothermia                                       | 30 (7%)                                         | 18 (7%)                                                                             |
| Tachypnea                                         | 23 (6%)                                         | 11 (4%)                                                                             |
| Perfusion or color                                | 23 (6%)                                         | 16 (6%)                                                                             |
| Emesis                                            | 21 (5%)                                         | 16 (6%)                                                                             |
| Increased HR                                      | 20 (5%)                                         | 10 (4%)                                                                             |
| Hyperthermia                                      | 20 (5%)                                         | 10 (4%)                                                                             |
| Increased work of breathing                       | 19 (5%)                                         | 10 (4%)                                                                             |
| Low urine output                                  | 19 (5%)                                         | 12 (5%)                                                                             |
| Residuals                                         | 16 (4%)                                         | 10 (4%)                                                                             |
| glucose                                           | 15 (4%)                                         | 10 (4%)                                                                             |

|                                                     |         |        |
|-----------------------------------------------------|---------|--------|
| Skin finding                                        | 15 (4%) | 5 (2%) |
| Discolored abdomen                                  | 11 (3%) | 6 (2%) |
| sodium                                              | 8 (2%)  | 3 (1%) |
| Bloody stool                                        | 6 (1%)  | 2 (1%) |
| creatinine                                          | 3 (1%)  | 2 (1%) |
| *only available at one NICU, excluded from analysis |         |        |

Table S4. Clinical signs prompting sepsis work-ups and their frequency. Signs with frequency  $\geq 5\%$  are shown in Figure 1, grouped by diagnosis.
